# Supplementary material for: Association between Socioeconomic Factors, Food Insecurity, and Dietary Patterns of Adolescents: A Latent Class Analysis
Source: MDPI journal article supplement (doi:10.3390/nu15204344), 2023-10-12
Supplement: s1 [file s1]

**Table S1.** Cutoff points, in grams of 75th percentile intake of food groups according to dietary pattern.

| Food Groups (grams)       | All participants<br>(n=1,215) | Dietary Patterns |                    |                            |                    |                 |                   |                 |                   |
|---------------------------|-------------------------------|------------------|--------------------|----------------------------|--------------------|-----------------|-------------------|-----------------|-------------------|
|                           |                               | Mixed (n=192)    |                    | Low Consumption<br>(n=644) |                    | Prudent (n=209) |                   | Diverse (n=170) |                   |
|                           |                               | 0                | 1                  | 0                          | 1                  | 0               | 1                 | 0               | 1                 |
|                           | Means (SE)                    | Means (SE)       | Means (SE)         | Means (SE)                 | Means (SE)         | Means<br>(SE)   | Means (SE)        | Means (SE)      | Means<br>(SE)     |
| Vegetables                | 117.9 (5.1)                   | 57.7 (4.2)       | 292.0 (16.1)       | 48.9 (2.0)                 | 221.6 (7.1)        | 66.4 (5.4)      | 294.6 (13.3)      | 75.6 (6.1)      | 371.3 (25.6)      |
| Fruits                    | 716.4 (24.9)                  | 485.5 (19.7)     | 1,450.9<br>(101.3) | 318.5 (7.6)                | 1,504.9<br>(111.0) | 527.7<br>(29.8) | 1,517.0<br>(40.8) | 592.8 (52.8)    | 2,002.3<br>(73.6) |
| Roots and tubers          | 60.6 (3.4)                    | 21.0 (1.4)       | 135.7 (10.9)       | 18.4 (0.9)                 | 146.4 (13.0)       | 25.6 (2.1)      | 150.2 (7.5)       | 23.0 (3.2)      | 238.9 (13.3)      |
| Red meat                  | 68.3 (2.5)                    | 41.3 (2.2)       | 165.5 (11.0)       | 30.3 (1.1)                 | 141.6 (8.1)        | 39.0 (2.2)      | 155.6 (7.6)       | 51.1 (4.0)      | 189.4 (7.4)       |
| Poultry and fish          | 105.8 (5.2)                   | 54.1 (3.2)       | 234.8 (17.8)       | 39.3 (1.0)                 | 220.9 (17.4)       | 57.7 (2.6)      | 278.0 (20.6)      | 72.2 (5.1)      | 342.1 (18.8)      |
| Milks                     | 31.5 (1.2)                    | 16.2 (1.9)       | 65.7 (2.2)         | 10.6 (0.5)                 | 53.8 (1.2)         | 15.2 (1.2)      | 65.5 (4.2)        | 21.2 (1.6)      | 77.0 (3.0)        |
| Rice and noodles          | 288.4 (9.0)                   | 187.9 (11.2)     | 589.2 (23.1)       | 147.3 (5.0)                | 497.3 (12.3)       | 192.6 (9.9)     | 586.2 (24.9)      | 256.3 (15.0)    | 791.5 (34.3)      |
| Legumes                   | 181.7 (4.5)                   | 146.1 (8.0)      | 368.8 (12.1)       | 111.8 (4.5)                | 380.7 (17.7)       | 149.6 (8.3)     | 363.1 (14.7)      | 171.2 (9.4)     | 413.5 (17.8)      |
| Typical foods             | 186.1 (8.3)                   | 90.4 (5.3)       | 424.6 (25.9)       | 74.4 (2.3)                 | 410.4 (28.8)       | 91.5 (3.8)      | 473.2 (35.7)      | 129.1 (8.9)     | 590.4 (25.9)      |
| Flours and cereals        | 70.3 (2.7)                    | 31.2 (1.8)       | 194.9 (18.2)       | 23.6 (0.8)                 | 146.8 (10.3)       | 36.3 (2.1)      | 171.7 (7.8)       | 47.0 (3.1)      | 243.6 (13.8)      |
| Bakery products           | 237.0 (5.6)                   | 191.5 (8.1)      | 462.5 (15.8)       | 130.9 (4.1)                | 437.0 (34.0)       | 179.9 (7.1)     | 458.3 (17.3)      | 248.7 (10.2)    | 543.6 (18.5)      |
| Dairy products            | 111.2 (5.1)                   | 42.2 (3.3)       | 285.9 (14.6)       | 33.2 (1.4)                 | 226.8 (12.2)       | 48.9 (2.9)      | 304.1 (19.2)      | 60.8 (6.1)      | 405.6 (20.4)      |
| Sweets and sugars         | 421.1 (14.0)                  | 289.8 (10.9)     | 860.0 (44.3)       | 206.7 (5.6)                | 709.1 (25.0)       | 303.3 (8.4)     | 800.5 (32.7)      | 326.4 (27.6)    | 1,138.3<br>(66.5) |
| Oils and fats             | 29.2 (0.9)                    | 23.2 (1.9)       | 63.0 (2.3)         | 15.8 (0.7)                 | 58.2 (1.7)         | 20.4 (1.0)      | 54.4 (1.5)        | 24.1 (1.4)      | 66.9 (2.4)        |
| Sugar-sweetened beverages | 679.4 (22.7)                  | 483.4 (13.8)     | 1,468.3<br>(75.0)  | 312.0 (8.4)                | 1,384.0<br>(66.3)  | 423.2<br>(20.8) | 1,379.9<br>(43.8) | 608.3 (31.2)    | 1,909.5<br>(78.0) |
| Fast food                 | 299.1 (11.0)                  | 188.0 (7.2)      | 646.3 (32.5)       | 129.8 (3.5)                | 544.7 (34.0)       | 190.2 (7.7)     | 615.7 (37.4)      | 241.6 (14.8)    | 889.3 (39.0)      |

0: <P75; 1: >P75. SE: Standard error.

The values in this table correspond to the values (means) in grams of the total food items that comprise each food group.
